# Supplementary material for: A three-dimensional integrated nanogenerator for effectively harvesting sound energy from the environment
Source: Royal Society of Chemistry journal article supplement (doi:10.1039/c5nr09087c), 2016-01-01
Supplement: c5nr09087c1.pdf [file c5nr09087c1.pdf]

## Supporting Information

### **A three-dimension integrated nanogenerator for effectively harvesting sound energy from the environment**

Jinmei Liu,<sup>a,†</sup> Nuanyang Cui,<sup>a,†</sup> Long Gu,<sup>a</sup> Xiaobo Chen,<sup>a</sup> Suo Bai,<sup>a,b</sup> Youbin Zheng,<sup>a</sup> Caixia

Hu,<sup>a</sup> and Yong Qin<sup>a,b,\*</sup>

<sup>a</sup> Institute of Nanoscience and Nanotechnology, School of Physical Science and Technology, Lanzhou University, Lanzhou, 730000, China.

\* To whom correspondence should be addressed, E-mail: qinyong@lzu.edu.cn

<sup>b</sup> The Research Institute of Biomedical Nanotechnology, Lanzhou University, Lanzhou 730000, China

† Authors with equal contribution

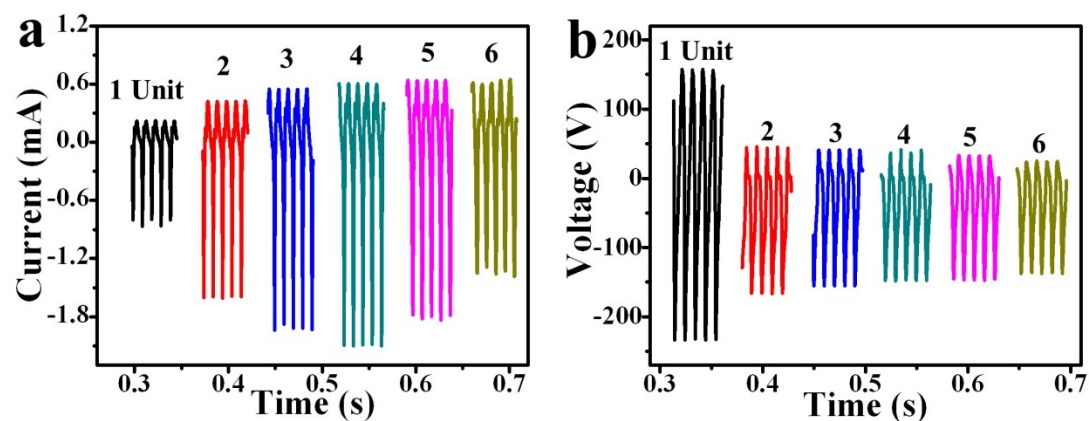

**Figure S1. The output electrical property of the ITNGs with different working units from 1 to 6 in sequence driven by sound wave at 100.5 dB and 200 Hz. (a) Short-circuit current. (b) Open-circuit voltage.**
